# Supplementary material
Source: MDPI journal article supplement (https://www.mdpi.com/2071-1050/11/21/6137)

|                                                                                                                                                                                                                                                                                                                                                                                                                                                                        |                |       |       |       |
|------------------------------------------------------------------------------------------------------------------------------------------------------------------------------------------------------------------------------------------------------------------------------------------------------------------------------------------------------------------------------------------------------------------------------------------------------------------------|----------------|-------|-------|-------|
| Intv #:                                                                                                                                                                                                                                                                                                                                                                                                                                                                | Team initials: | Date: | Time: | Zone: |
| What are you doing in Prospect Park today?                                                                                                                                                                                                                                                                                                                                                                                                                             |                |       |       |       |
| And why do you choose to come to Prospect Park <i>specifically</i> ?                                                                                                                                                                                                                                                                                                                                                                                                   |                |       |       |       |
| How often do you visit Prospect Park?<br><input type="checkbox"/> Daily <input type="checkbox"/> Weekly <input type="checkbox"/> Monthly <input type="checkbox"/> Occasionally <input type="checkbox"/> Rarely                                                                                                                                                                                                                                                         |                |       |       |       |
| How far did you travel to get to Prospect Park?<br><input type="checkbox"/> Less than 5 blocks <input type="checkbox"/> 6-10 blocks <input type="checkbox"/> 11-20 blocks <input type="checkbox"/> Over 20 blocks                                                                                                                                                                                                                                                      |                |       |       |       |
| When did you first visit Prospect Park? ( <i>estimate year of first visit; if they say "5 years ago"= 2011</i> )                                                                                                                                                                                                                                                                                                                                                       |                |       |       |       |
| Do you ever go to the woods here in Prospect Park? <input type="checkbox"/> Yes <input type="checkbox"/> No<br>( <i>gesture or explain based the Ravine, the waterfall, Lookout Hill</i> )<br>→If yes, what do you do?<br><br>→If no, why not?                                                                                                                                                                                                                         |                |       |       |       |
| Where else do you like to go in the outdoors? ( <i>capture named sites &amp; specific geography whenever possible</i> )                                                                                                                                                                                                                                                                                                                                                |                |       |       |       |
| Are you involved in any groups that help take care of the environment? <input type="checkbox"/> Yes <input type="checkbox"/> No <input type="checkbox"/> No, but...<br>If necessary, prompt interviewee to think about LOCAL stewardship activities / groups, within NYC<br>→If "yes," which group(s)?<br><br>→If "no," why not?<br><br>→If "no, but," capture details: ( <i>e.g.: related profession, individual practice, home stewardship, other volunteerism</i> ) |                |       |       |       |
| Are you aware of who takes care of Prospect Park? <input type="checkbox"/> Yes <input type="checkbox"/> No<br><br>→ If Yes, can you name the group? ( <i>fill in, ask if they want brochure, thank them, end interview</i> )                                                                                                                                                                                                                                           |                |       |       |       |

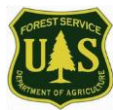

**PROSPECT PARK BROAD QUESTION– 2016**
☐ **WEEKDAY**
☐ **EVENING**
☐ **WEEKEND**

**FIELD NOTES:** *Take note of any interesting context or responses. Make note of whether the person is alone, in a pair, in a small group, or a large group.*

|                                                                                                                                                                                                                                                                                                                                                                                                                                                                                                         |                       |              |              |              |
|---------------------------------------------------------------------------------------------------------------------------------------------------------------------------------------------------------------------------------------------------------------------------------------------------------------------------------------------------------------------------------------------------------------------------------------------------------------------------------------------------------|-----------------------|--------------|--------------|--------------|
| <b>Intv #:</b>                                                                                                                                                                                                                                                                                                                                                                                                                                                                                          | <b>Team initials:</b> | <b>Date:</b> | <b>Time:</b> | <b>Zone:</b> |
| <b>What are you doing in Prospect Park today?</b>                                                                                                                                                                                                                                                                                                                                                                                                                                                       |                       |              |              |              |
| <b>And why do you choose to come to Prospect Park <i>specifically</i>?</b>                                                                                                                                                                                                                                                                                                                                                                                                                              |                       |              |              |              |
| <b>How often do you visit Prospect Park?</b><br><input type="checkbox"/> Daily <input type="checkbox"/> Weekly <input type="checkbox"/> Monthly <input type="checkbox"/> Occasionally <input type="checkbox"/> Rarely                                                                                                                                                                                                                                                                                   |                       |              |              |              |
| <b>How far did you travel to get to Prospect Park?</b><br><input type="checkbox"/> Less than 5 blocks <input type="checkbox"/> 6-10 blocks <input type="checkbox"/> 11-20 blocks <input type="checkbox"/> Over 20 blocks                                                                                                                                                                                                                                                                                |                       |              |              |              |
| <b>When did you first visit Prospect Park?</b> <i>(estimate year of first visit; if they say "5 years ago"= 2011)</i>                                                                                                                                                                                                                                                                                                                                                                                   |                       |              |              |              |
| <b>Do you ever go to the woods here in Prospect Park?</b> <input type="checkbox"/> Yes <input type="checkbox"/> No<br><i>(gesture or explain based the Ravine, the waterfall, Lookout Hill)</i><br><b>→If yes, what do you do?</b><br><br><b>→If no, why not?</b>                                                                                                                                                                                                                                       |                       |              |              |              |
| <b>Where else do you like to go in the outdoors?</b> <i>(capture named sites &amp; specific geography whenever possible)</i>                                                                                                                                                                                                                                                                                                                                                                            |                       |              |              |              |
| <b>Are you involved in any groups that help take care of the environment?</b> <input type="checkbox"/> Yes <input type="checkbox"/> No <input type="checkbox"/> No, but...<br><i>If necessary, prompt interviewee to think about LOCAL stewardship activities / groups, within NYC</i><br><b>→If "yes," which group(s)?</b><br><br><b>→If "no," why not?</b><br><br><b>→If "no, but," capture details:</b> <i>(e.g.: related profession, individual practice, home stewardship, other volunteerism)</i> |                       |              |              |              |

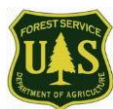

**PROSPECT PARK BROAD QUESTION– 2016**

☐ **WEEKDAY**

☐ **EVENING**

☐ **WEEKEND**

**Are you aware of who takes care of Prospect Park?**

☐ **Yes**

☐ **No**

➔ **If Yes, can you name the group?** *(fill in, ask if they want brochure)*

**FIELD NOTES:** *Take note of any interesting context or responses. Make note of whether the person is alone, in a pair, in a small group, or a large group.*

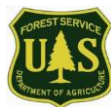

Supplement: s1 [file s1 › Appendix S1 Broad Question Protocol.pdf]
