# Supplementary material
Source: MDPI journal article supplement (https://www.mdpi.com/2071-1050/11/21/6137)

**PROSPECT PARK INTERVIEW – DIRECT QUESTION**

☐ WEEKDAY

☐ EVENING

☐ WEEKEND

|                                                                                                                                                                                                                   |                |       |       |       |
|-------------------------------------------------------------------------------------------------------------------------------------------------------------------------------------------------------------------|----------------|-------|-------|-------|
| Intv #:                                                                                                                                                                                                           | Team initials: | Date: | Time: | Zone: |
| What are you doing in Prospect Park today?                                                                                                                                                                        |                |       |       |       |
| How often do you visit Prospect Park?<br><input type="checkbox"/> Daily <input type="checkbox"/> Weekly <input type="checkbox"/> Monthly <input type="checkbox"/> Occasionally <input type="checkbox"/> Rarely    |                |       |       |       |
| How far did you travel to get to Prospect Park?<br><input type="checkbox"/> Less than 5 blocks <input type="checkbox"/> 6-10 blocks <input type="checkbox"/> 11-20 blocks <input type="checkbox"/> Over 20 blocks |                |       |       |       |
| When did you first visit Prospect Park? <i>(estimate year of first visit; if they say "5 years ago"= 2012)</i>                                                                                                    |                |       |       |       |
| Does spending time in Prospect Park improve your day or your life?<br><br><i>(if 'yes' then ask "How or in what ways?")</i>                                                                                       |                |       |       |       |
| What would you miss if Prospect Park did not exist?                                                                                                                                                               |                |       |       |       |
| How well does Prospect Park meet your need for open space?                                                                                                                                                        |                |       |       |       |
| What is your favorite spot(s) in the park? <i>(Gesture to the map on the back. Have them mark an X if possible.)</i><br><br>Why?                                                                                  |                |       |       |       |
| Field Notes                                                                                                                                                                                                       |                |       |       |       |

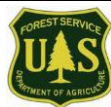

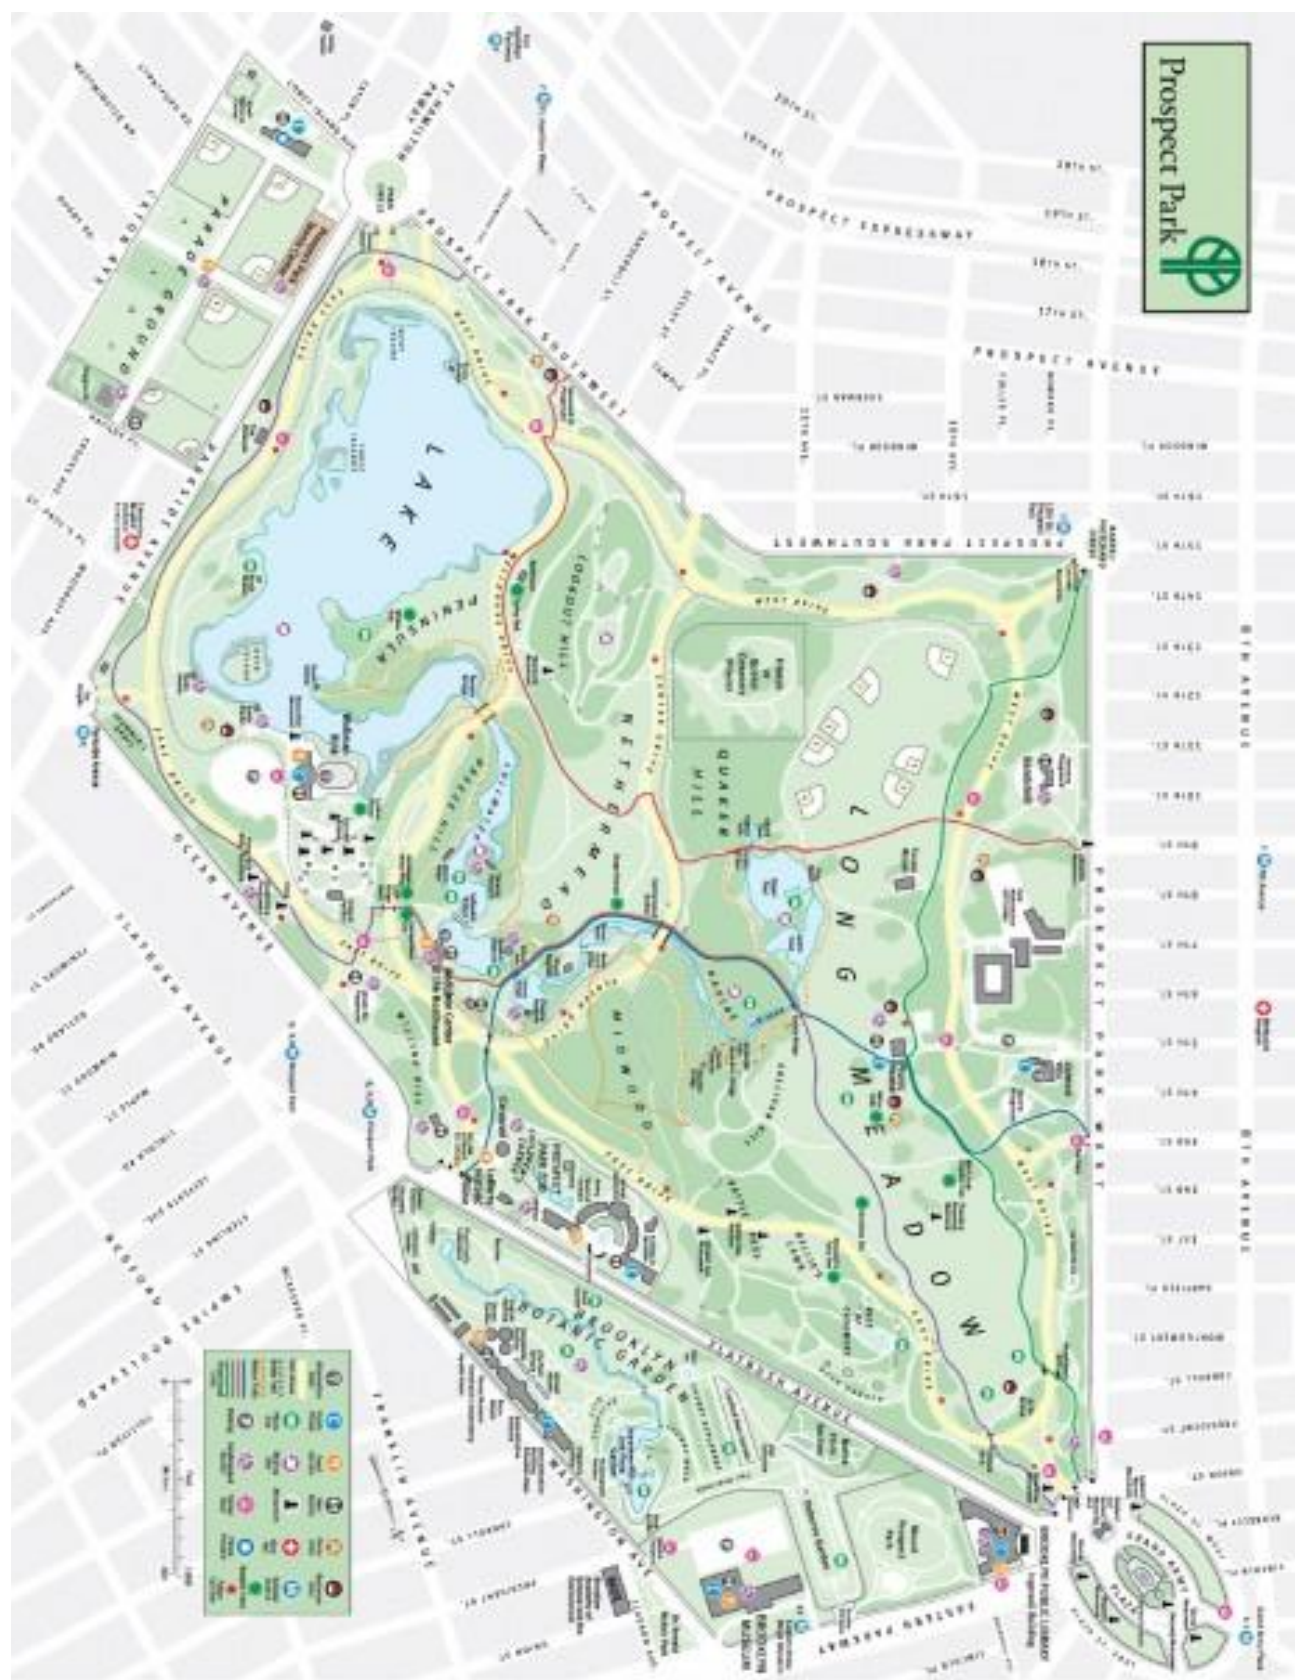

Supplement: s1 [file s1 › Appendix S2 Direct Question Protocol.pdf]
