# Supplementary material
Source: MDPI journal article supplement (https://www.mdpi.com/2071-1050/11/21/6137)
Supplement: s1 [file s1]

Archive with 3 entries (3 files):
- Appendix S1 Broad Question Protocol.pdf
- Appendix S2 Direct Question Protocol.pdf
- TableS1.docx
