# Supplementary material
Source: MDPI journal article supplement (https://www.mdpi.com/2071-1050/11/21/6137)
Supplement: s1 [file s1 › TableS1.docx]

**Table S1.** Emergent themes, as open coded from geotagged tweets and broad and directed questions for Prospect Park, Brooklyn

| Emergent Themes | Tweets | % | Broad | % | Directed | % |
| --- | --- | --- | --- | --- | --- | --- |
| Observation | 126 | 27.9% | 0 | 0.0% | 0 | 0.0% |
| Programming | 125 | 27.7% | 9 | 3.1% | 1 | 2.6% |
| Natural feature | 74 | 16.4% | 0 | 0.0% | 0 | 0.0% |
| Built feature | 73 | 16.2% | 1 | 0.3% | 0 | 0.0% |
| Positive sentiment | 66 | 14.6% | 2 | 0.7% | 2 | 5.1% |
| Self | 63 | 14.0% | 0 | 0.0% | 0 | 0.0% |
| Food | 32 | 7.1% | 0 | 0.0% | 0 | 0.0% |
| Relaxation | 27 | 6.0% | 0 | 0.0% | 8 | 20.5% |
| Wildlife | 25 | 5.5% | 2 | 0.7% | 1 | 2.6% |
| Weather | 24 | 5.3% | 3 | 1.0% | 0 | 0.0% |
| News | 10 | 2.2% | 0 | 0.0% | 0 | 0.0% |
| Explore | 9 | 2.0% | 7 | 2.4% | 0 | 0.0% |
| Negative Sentiment | 4 | 0.9% | 0 | 0.0% | 0 | 0.0% |
| Work / Service | 4 | 0.9% | 7 | 2.4% | 0 | 0.0% |
| Dog | 3 | 0.7% | 0 | 0.0% | 1 | 2.6% |
| Memory | 3 | 0.7% | 6 | 2.1% | 1 | 2.6% |
| Well-being | 0 | 0.0% | 0 | 0.0% | 5 | 12.8% |
| Kids | 0 | 0.0% | 0 | 0.0% | 3 | 7.7% |
| Local | 0 | 0.0% | 173 | 60.1% | 0 | 0.0% |
| Nature - outdoors | 0 | 0.0% | 30 | 10.4% | 0 | 0.0% |
| Enjoyment | 0 | 0.0% | 15 | 5.2% | 0 | 0.0% |
| **Total** | **451** | **100.0%** | **288** | **100.0%** | **39** | **100.0%** |
